# Supplementary material
Source: HighWire-hosted journal article supplement (https://bmjopen.bmj.com/content/14/4/e081106)
Supplement: inline-supplementary-material-1 [file inline-supplementary-material-1.pdf]

## Supplemental File 1

### Definitions of characteristics of mothers and babies

- Prematurity: recorded gestation at birth (weeks and days. Pre-term (<37 weeks); Term (37+ weeks).
- Previous live birth: self-reported by the mother and identified by the midwife.
- Disability reported at booking: any disability self-reported by the mother at the booking appointment.
- Safeguarding concerns reported at booking: any safeguarding concerns self-reported by the mother or identified by the midwife at the booking appointment.
- Gestation at booking: gestational age (weeks and days) recorded at the booking appointment.
- Mother's ethnicity: self-reported by the mother at the booking appointment.
- Mother born in UK: self-reported by the mother at the booking appointment.
- Model of care: recorded by the midwife.
- Mother's attendance at antenatal appointments: recorded by the midwife.
- Mother's age at booking: recorded by the midwife.
